# Supplementary material for: Repression of Middle Sporulation Genes in Saccharomyces cerevisiae by the Sum1-Rfm1-Hst1 Complex Is Maintained by Set1 and H3K4 Methylation
Source: Oxford University Press journal article supplement (doi:10.1534/g3.117.300150), 2017-10-25
Supplement: 300150_files1.pdf [file 300150_files1.pdf]

## SUPPLEMENTAL MATERIALS

Jaiswal *et al.*

**Repression of middle sporulation genes in *Saccharomyces cerevisiae* by the Sum1-Rfm1-Hst1 complex is maintained by Set1 and H3K4 methylation**

Figure S1

Figure S2

Figure S3

Figure S4

Table S1

Supplemental References

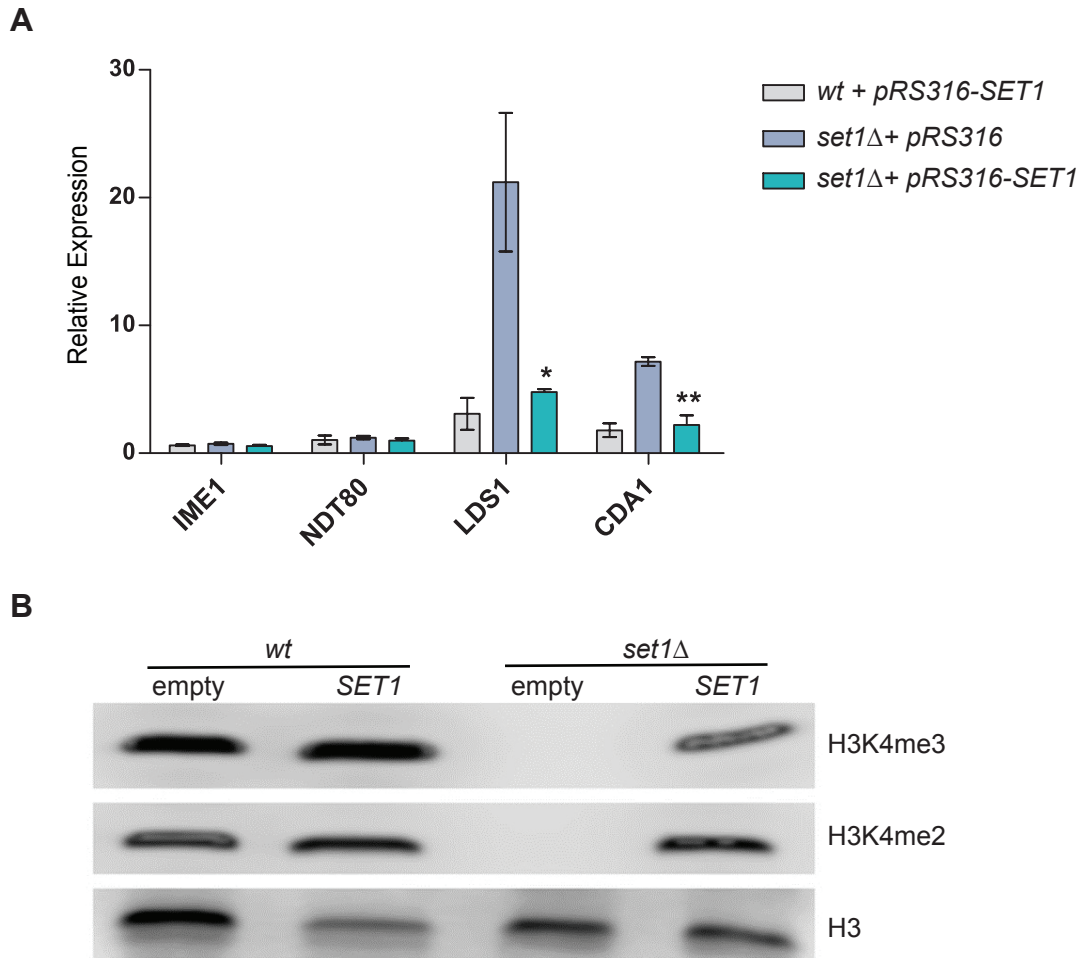

**Figure S1. Expression of episomal *SET1* in *set1Δ* cells rescues the defect in middle sporulation gene repression.** (A) Expression of early and middle genes by qRT-PCR in wildtype and *set1Δ* cells carrying either *pRS316-SET1* or an empty *pRS316* vector. Cells were grown in synthetic complete medium with glucose and lacking uracil. *pRS316-SET1* expresses *SET1* under the control of its endogenous promoter. Expression levels were normalized to the control gene *TFC1*. Error bars represent SEM for three biological replicates. Asterisks represent *p*-value (\* < 0.05; \*\* < 0.01; \*\*\* < 0.001) from unpaired t tests comparing *set1Δ* with *pRS316-SET1* to *set1Δ* with *pRS316*. (B) Western blotting of whole cell extracts from wildtype and *set1Δ* cells carrying either *pRS316-SET1* or an empty *pRS316*. Antibodies recognizing H3K4me3, H3K4me2 and H3, as loading control, were used.

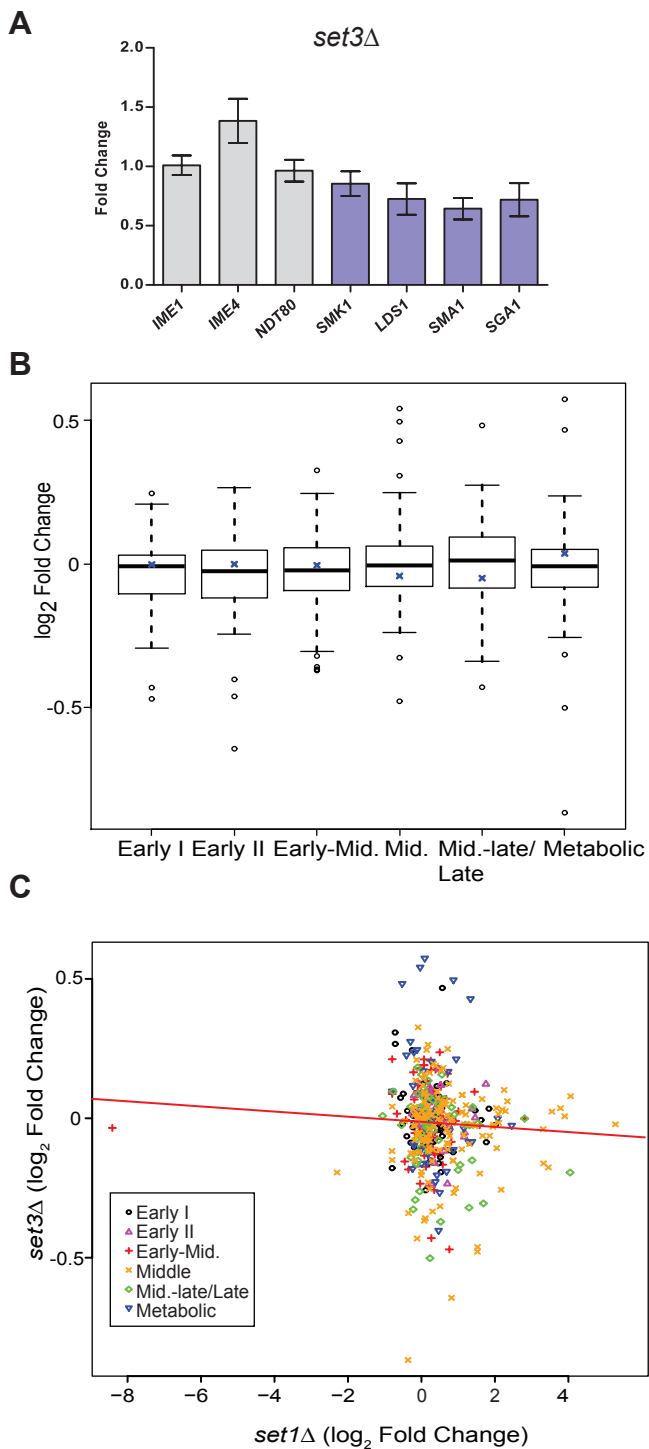

**Figure S2. Set1-mediated repression of middle sporulation genes does not depend on Set3.** (A) qRT-PCR of mRNA levels of early (gray) and middle (purple) sporulation genes in *set3Δ* cells. Data are presented as described for Figure 2. (B) Log<sub>2</sub> fold-change of genes from *set3Δ* cells belonging to each of the indicated sporulation classes, as previously defined (CHU *et al.* 1998). Genome-wide expression values for

*set3Δ* cells were obtained from previously-published microarray results (KEMMEREN *et al.* 2014). Data are presented as described for Figure 1C. (C) Linear regression model of  $\log_2$  fold-change expression values for *set1Δ* relative to *set3Δ* mutants for genes that encompass each of the sporulation classes.

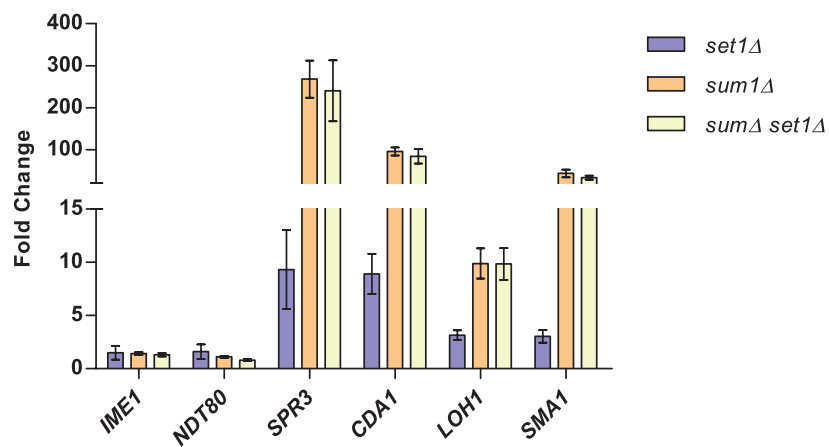

**Figure S3. Middle sporulation gene expression in *set1Δ* and *sum1Δ* single and double mutants.** Expression of early and middle genes by qRT-PCR in wildtype and *set1Δ*, *sum1Δ* and *set1Δ sum1Δ* cells. Expression levels were normalized to the control gene *TFC1*. Error bars represent SEM for three biological replicates.

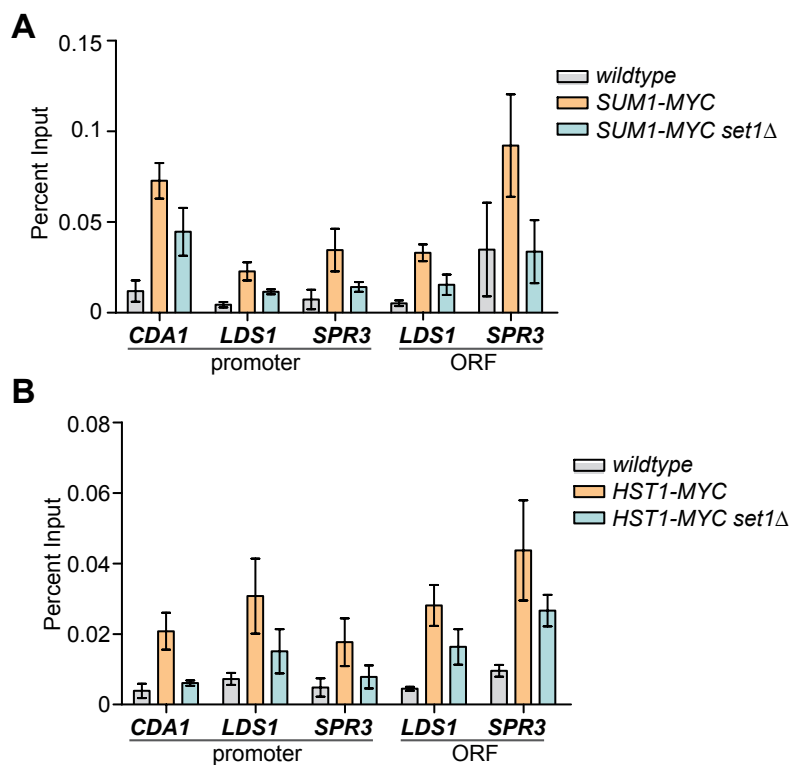

**Figure S4. chIP of Sum1-MYC and Hst1-MYC in wildtype and *set1*Δ cells at middle sporulation genes.** chIP with anti-MYC from wildtype and *set1*Δ cells with either Sum1-MYC or Hst1-MYC expressed from their endogenous loci. A wildtype strain without an epitope tag was used as a negative control. qPCR of immunoprecipitated DNA was performed with primers to amplify the promoter or ORF sequences as indicated. Percent input was determined as described in Materials and Methods. Error bars represent SEM of three biological replicates.

**Table S1. Primers used in this study.**

| <b>Oligo #</b> | <b>Experiment</b> | <b>ORF/Position</b> | <b>Sequence</b>             |
|----------------|-------------------|---------------------|-----------------------------|
| oEG907         | GEX               | IME1 F              | GCAACTGGTCCTGAAAGAGG        |
| oEG908         | GEX               | IME1 R              | GTGGAACGTAGATGCGGATT        |
| oEG905         | GEX               | IME4 F              | AAAACGGAAACCAGCCACAC        |
| oEG906         | GEX               | IME4 R              | TCCAATACTGCTGCTGATGC        |
| oEG897         | GEX               | NDT80 F             | ACCTTTCATGGGGAGAATCC        |
| oEG898         | GEX               | NDT80 R             | GAGGCGTTTTTCATTTCTTGC       |
| oEG899         | GEX               | SMK1 F              | TGTCATCCACCGAGATTTGA        |
| oEG900         | GEX               | SMK1 R              | ACCCCTAGCGAGACCAAAT         |
| oEG901         | GEX               | LDS1 F              | TTTGCCCTGGTAAGCTTTGT        |
| oEG902         | GEX               | LDS1 R              | GGCAATGAAAAGCCCAATAG        |
| oEG959         | GEX               | CDA1 F              | GGCAAACATTTCCCAAGTA         |
| oEG960         | GEX               | CDA1 R              | CCCACAAGACAACCGTTAGG        |
| oEG963         | GEX               | SPR3 F              | TCTGGATTGCTGAGGAAGT         |
| oEG964         | GEX               | SPR3 R              | TTTCAGTTCAGGGCTTTTCG        |
| oEG961         | GEX               | LOH1 F              | CTCAAGGAGTGGCCGATTTA        |
| oEG962         | GEX               | LOH1 R              | TATGAAACCGATGCTTCCAA        |
| oEG903         | GEX               | SMA1 F              | AGTTCCATTTAGGCCCTGGT        |
| oEG904         | GEX               | SMA1 R              | TGCCGCGTTAGTAAAAGACC        |
| oEG797         | GEX               | SGA1 F              | GCTTCCCATCTTCCGTTTGA        |
| oEG798         | GEX               | SGA1 R              | ACCCGTTGCATTTTTGGAGC        |
| oEG543         | GEX               | TFC1 F              | AACTCCAGGCGGTATTGAC         |
| oEG544         | GEX               | TFC1 R              | CTTCTGCAATGTTTGGCTCA        |
| oEG936         | ChIP              | LDS1 promoter F     | TGAAAAGGAAGTTTCAAATCA       |
| oEG937         | ChIP              | LDS1 promoter R     | CCTGTTGTTGTTATTGTTTGTATAATG |
| oEG938         | ChIP              | LDS1 5' ORF F       | GGAGGCCAATCGTATGAAAA        |
| oEG939         | ChIP              | LDS1 5' ORF R       | CACGTATCTGGTACGGCTCA        |
| oEG965         | ChIP              | CDA1 promoter F     | TTTTCCAGATGTCACATTTTCC      |
| oEG966         | ChIP              | CDA1 promoter R     | CAACCCACTTGTGGTATTTTTTC     |
| oEG967         | ChIP              | SPR3 promoter F     | TGGTAGTGGAAAGAAAAGGATCA     |
| oEG968         | ChIP              | SPR3 promoter R     | TCAATGACGCAAAGGAATTT        |
| oEG893         | ChIP              | NDT80 promoter F    | CTGACAAAGCTCCAGAACGGT       |
| oEG894         | ChIP              | NDT80 promoter R    | AGGGACCTTGGCTTTTTCGAA       |
| oEG153         | ChIP              | PMA1 5' ORF F       | TCAGCTCATCAGCCAACCTCAAG     |
| oEG154         | ChIP              | PMA1 5' ORF R       | CGTCGACACCGTGATTAGATTG      |
| oEG568         | ChIP              | ERG11 5' ORF F      | CCTCTTATTCCGTCGGTGAA        |
| oEG569         | ChIP              | ERG11 5' ORF R      | TGTGTCTACCACCACCGAAA        |

The experiment type, either for qPCR analysis of gene expression (GEX) or chromatin immunoprecipitation (ChIP) is listed for each primer. Promoter or ORF location is indication for chIP primers. Sense primers are designated forward (F) and antisense primers as reverse (R).

### **Supplemental References**

Chu, S., J. DeRisi, M. Eisen, J. Mulholland, D. Botstein *et al.*, 1998 The transcriptional program of sporulation in budding yeast. *Science* 282: 699-705.

Kemmeren, P., K. Sameith, L. A. van de Pasch, J. J. Benschop, T. L. Lenstra *et al.*, 2014 Large-scale genetic perturbations reveal regulatory networks and an abundance of gene-specific repressors. *Cell* 157: 740-752.
